# Supplementary material
Source: Research Square preprint supplement (doi:10.21203/rs.3.rs-9116265/v1)
Supplement: Supplementary file 1 [file 22e9fe2bab81cdc6cbe5aefb.docx]

**Appendix. Interview questions about AI impacts on archivists’ work practices**

1. What AI technologies have you used in your work?
2. What have you used those AI technologies for?
3. Has AI replaced some tasks of your job?
4. Has AI augmented your ability to do some tasks of your job?
5. Has AI created new tasks that you did not do previously?
6. Has AI improved the efficiency of your work?
7. Has AI freed your time for other tasks?
8. Has AI caused you or anyone in your organization to be reallocated to different roles?
9. Have some roles/jobs in your workplace been discontinued due to the adoption of AI?
10. Has AI created new jobs/roles in your workplace?
11. Have new people been hired in your workplace due to the impact of AI?
12. Do you know of any archivists who have lost their job because of AI?
13. Has AI caused any other changes in your work practices?
14. How do you think AI will affect your work practices in the next 10 years?
